# Supplementary material
Source: PubMed Central journal article supplement (PMC4224168)
Supplement: 7cd3e5eaaf0bcc99949c8b9e66f1ca7e_genetics.114.168252-1.pdf [file 7cd3e5eaaf0bcc99949c8b9e66f1ca7e_genetics.114.168252-1.pdf]

**A**

## Plate Guide

|               | WT                             | <i>ste12Δ</i> |                               |
|---------------|--------------------------------|---------------|-------------------------------|
| <i>mcy1Δ</i>  | <i>mcy1Δ</i><br><i>ste12Δ</i>  | <i>pnc1Δ</i>  | <i>pnc1Δ</i><br><i>ste12Δ</i> |
| <i>mnl1Δ</i>  | <i>mnl1Δ</i><br><i>ste12Δ</i>  | <i>rxt3Δ</i>  | <i>rxt3Δ</i><br><i>ste12Δ</i> |
| <i>cwc27Δ</i> | <i>cwc27Δ</i><br><i>ste12Δ</i> | <i>ssn8Δ</i>  | <i>ssn8Δ</i><br><i>ste12Δ</i> |
| <i>nut1Δ</i>  | <i>nut1Δ</i><br><i>ste12Δ</i>  | <i>ela1Δ</i>  | <i>ela1Δ</i><br><i>ste12Δ</i> |

## YEPD

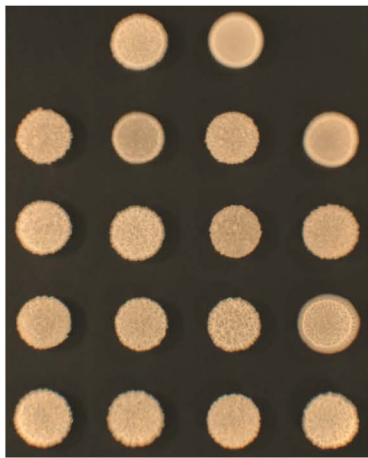

## Wash

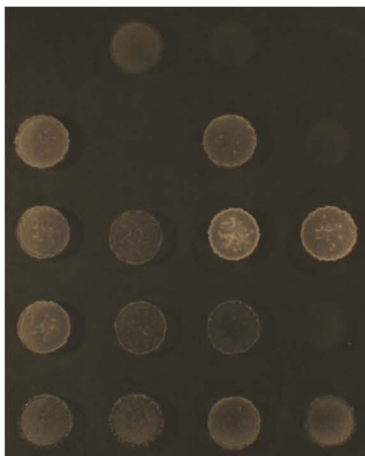**B**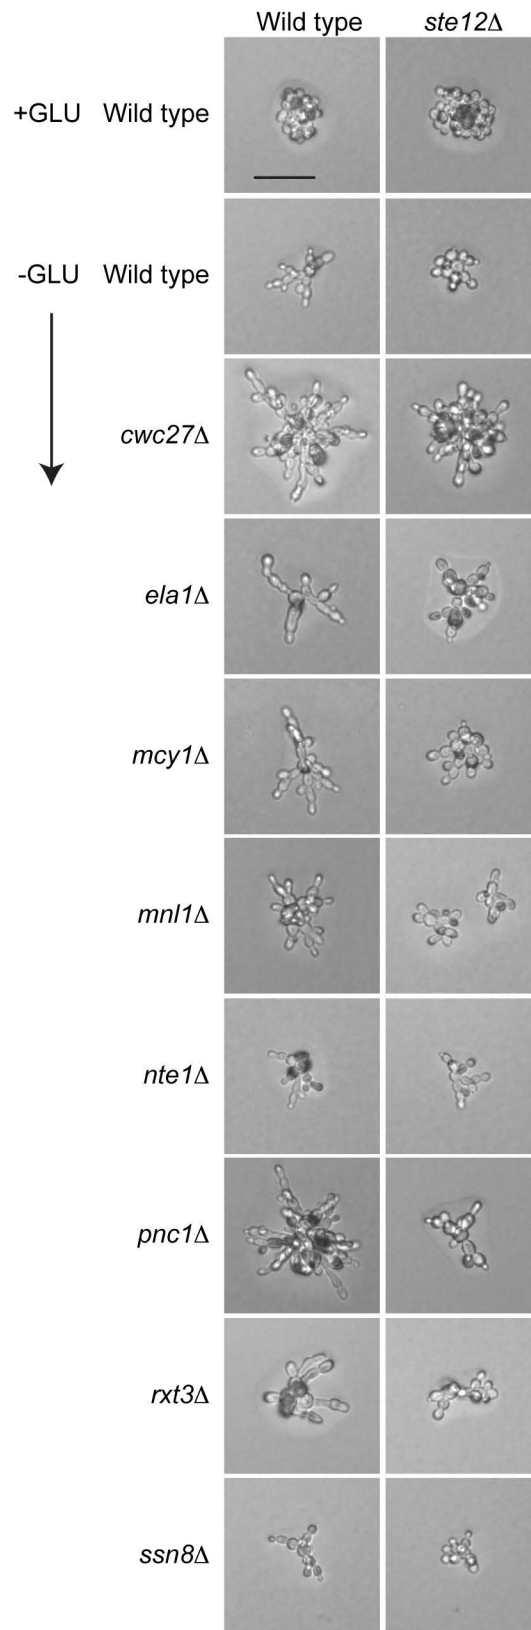

**Fig. S3. Suppression of hyper-invasive growth phenotypes of mutants identified in the screen by deletion of *STE12*.** **A)** Wild-type and *ste12Δ* mutant combinations as indicated were examined by the plate-washing assay, or in **B)** by the single cell assay. Bar, 30 microns. The *mcy1* mutant may contain a second mutation based on retesting.
