# Supplementary material
Source: PubMed Central journal article supplement (PMC4224168)
Supplement: 820c06c3487338304b690d336c0e939a_genetics.114.168252-10.pdf [file 820c06c3487338304b690d336c0e939a_genetics.114.168252-10.pdf]

**A**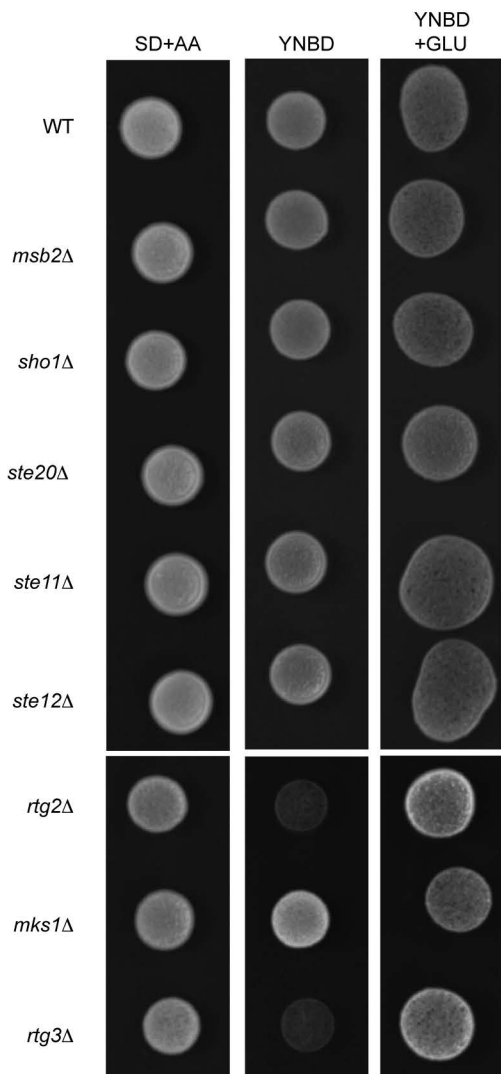**B**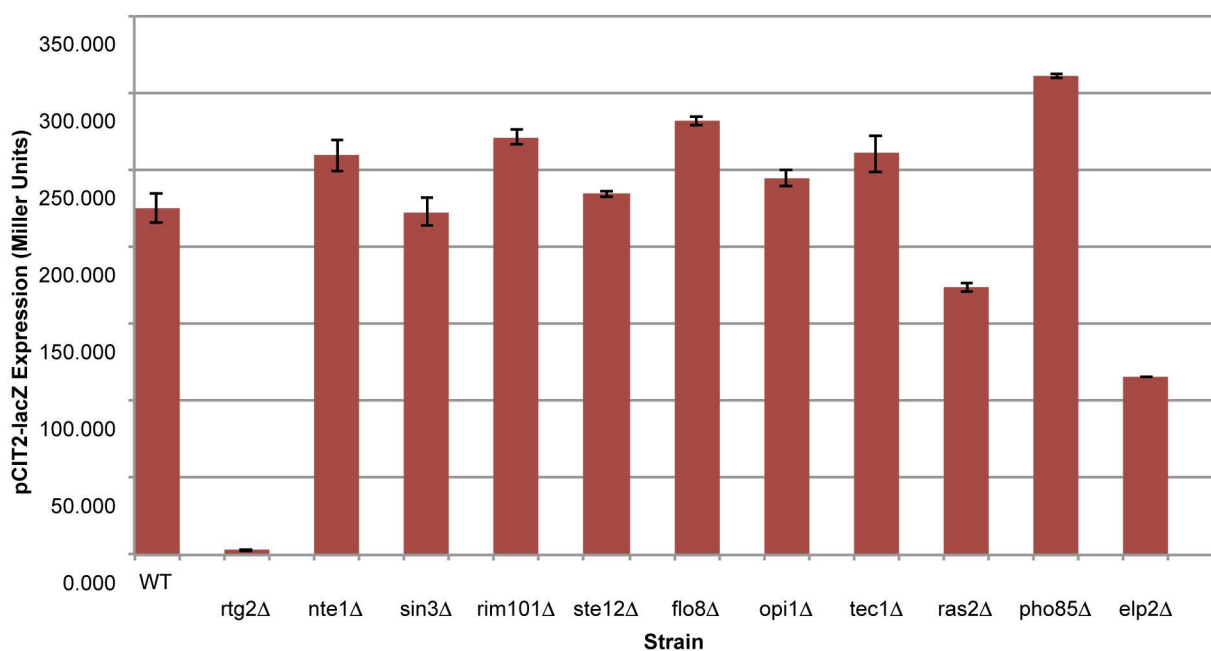

**Figure S7. The filamentous growth MAPK pathway does not regulate the RTG response.** A) Strains were spotted onto plates containing 6.7% Yeast Nitrogen Base without amino acids and supplemented with uracil with or without glutamate. Glutamate auxotrophy reflects a defective RTG pathway. B) *CIT2-lacZ* analysis of selected mutants.  $\beta$ -galactosidase assays were performed in duplicate; error bars represent standard deviation between samples.
