# Supplementary material
Source: PubMed Central journal article supplement (PMC4224168)
Supplement: 6865b5ba5aea666ae38bb3f50d0b90b4_genetics.114.168252-8.pdf [file 6865b5ba5aea666ae38bb3f50d0b90b4_genetics.114.168252-8.pdf]

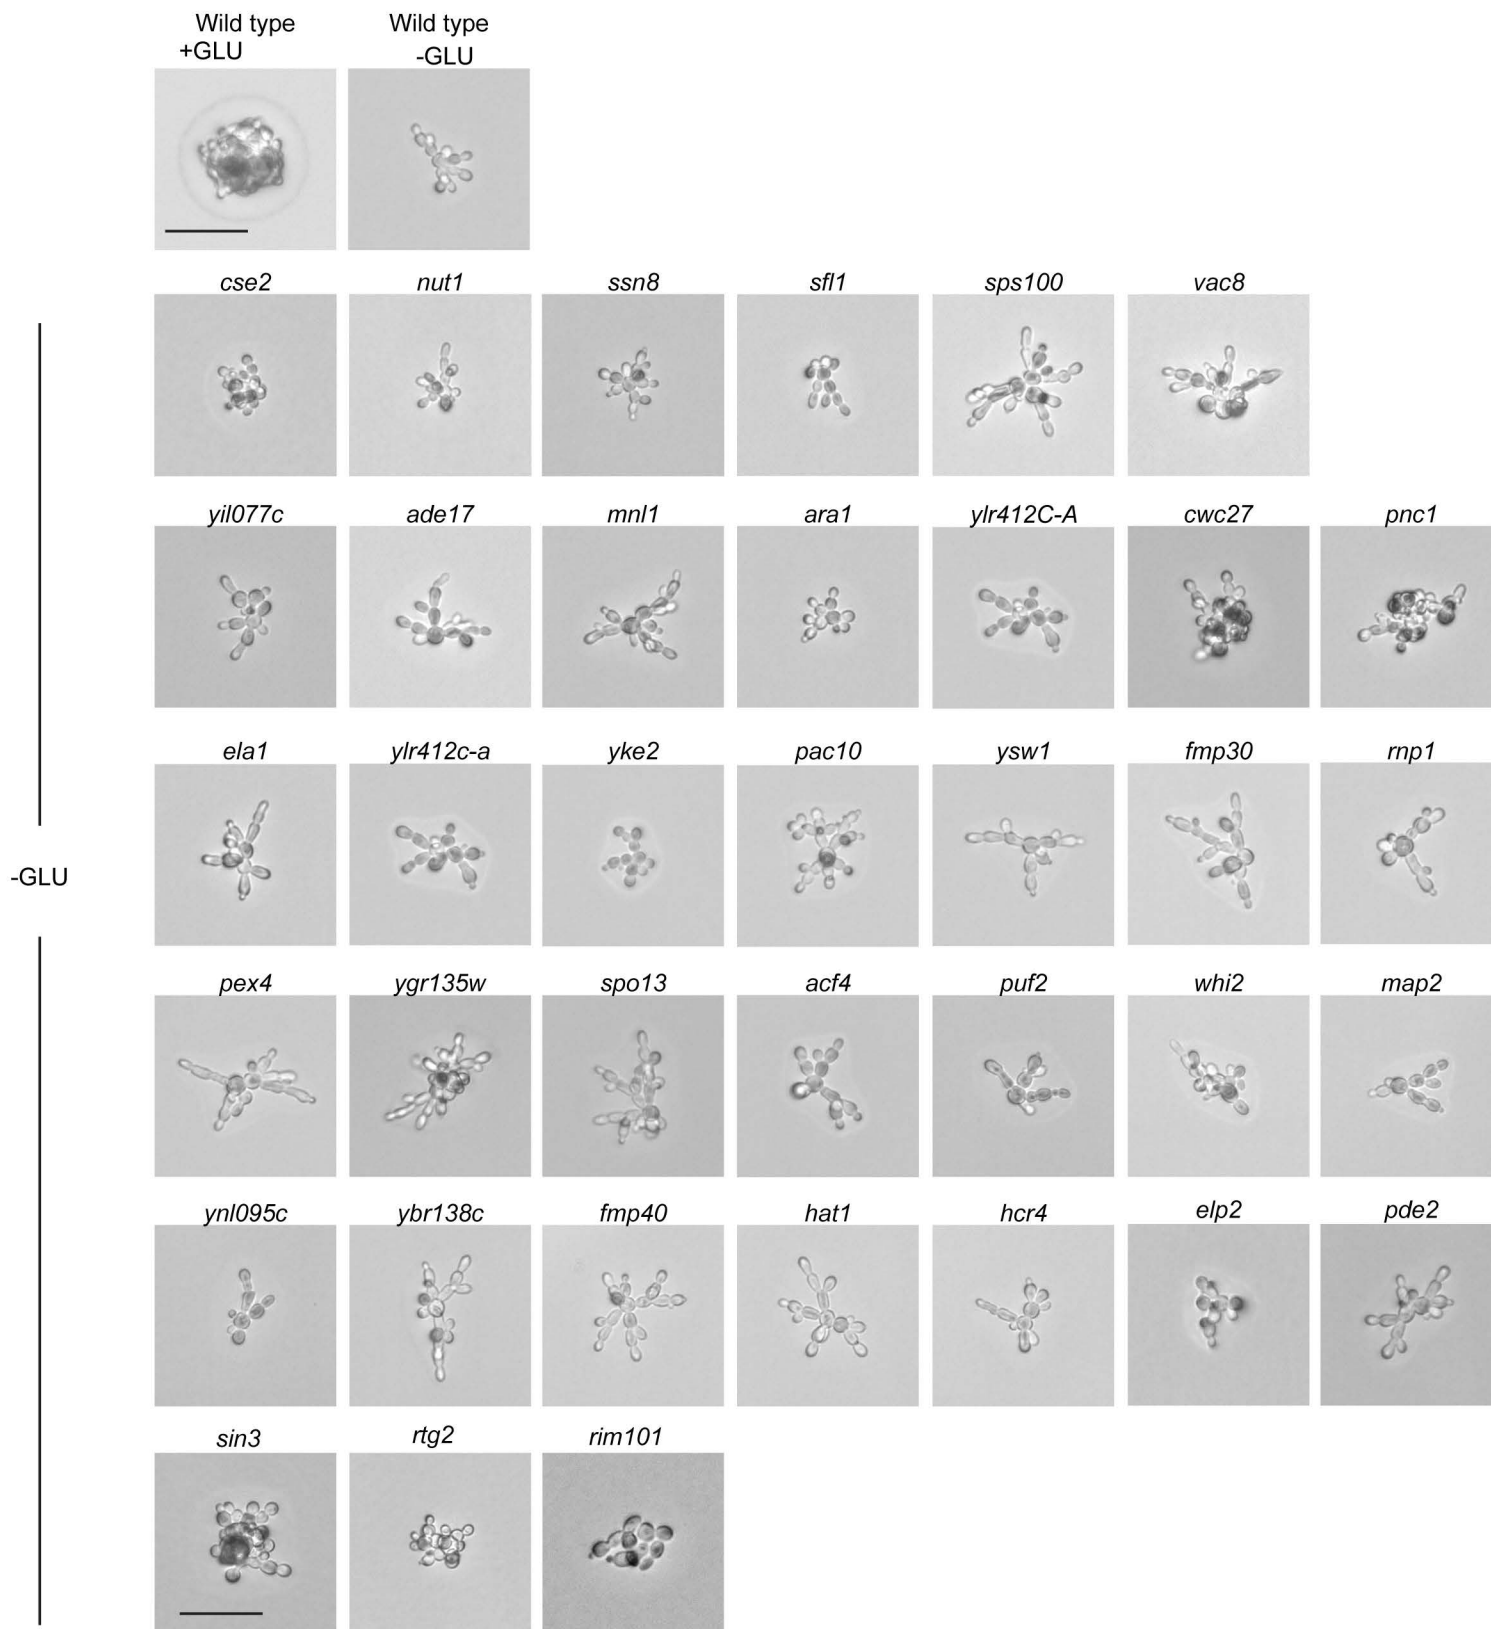

**Figure S2. The role of filamentous growth MAPK pathway regulators in filament formation by the single cell invasive growth assay.** Wild-type strain and the indicated mutants were grown on S-GLU medium for 16 hr and photographed at 100X. Bar, 20 microns.
