# Supplementary material
Source: PubMed Central journal article supplement (PMC4224168)
Supplement: 8087e6269d6bbcb606525bd4e3aaf23c_genetics.114.168252-12.pdf [file 8087e6269d6bbcb606525bd4e3aaf23c_genetics.114.168252-12.pdf]

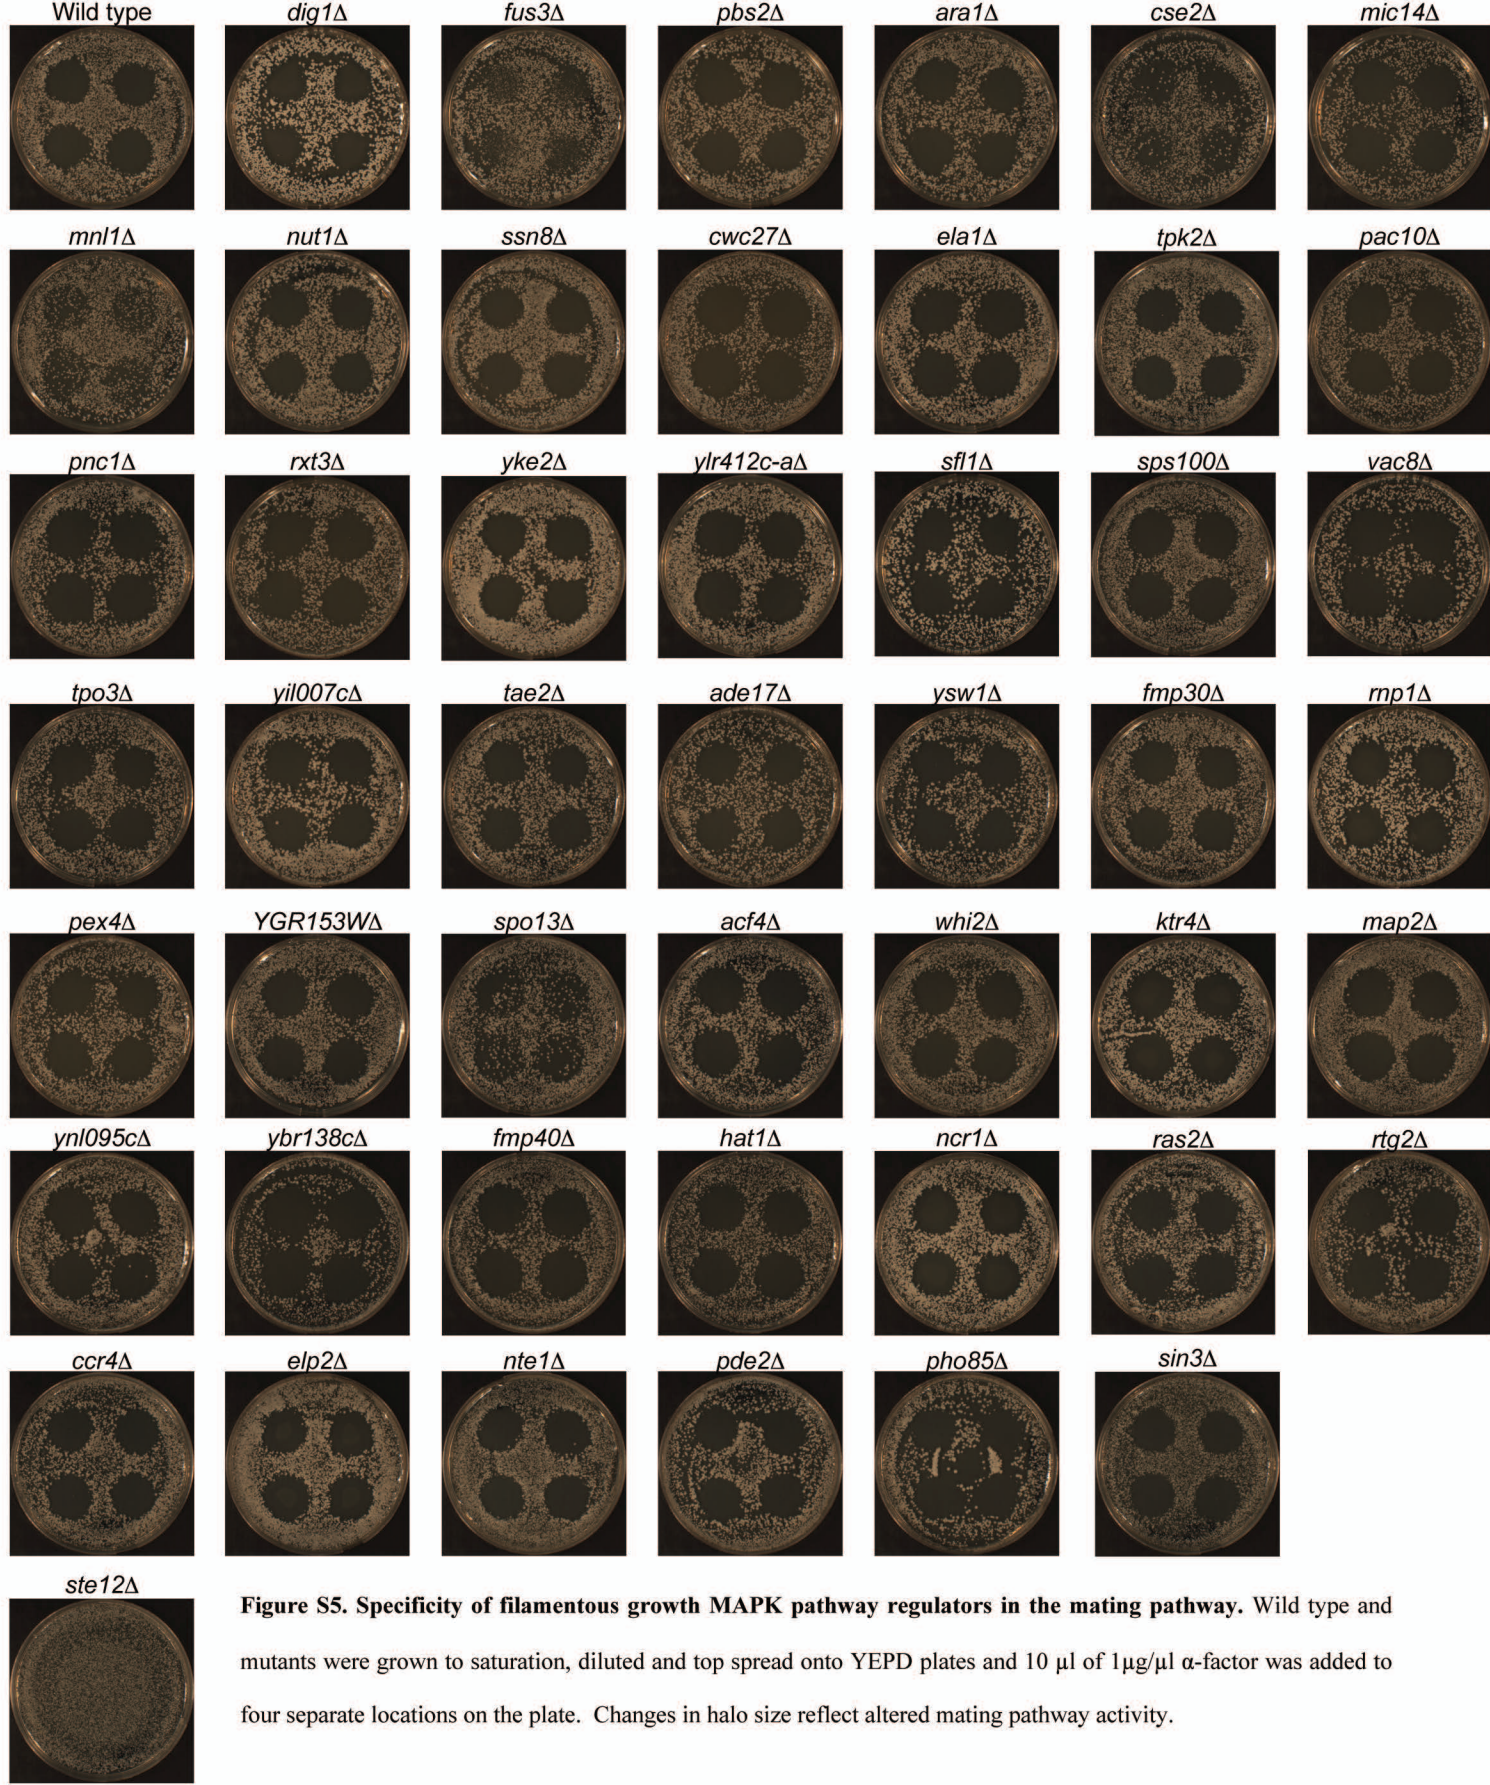

**Figure S5. Specificity of filamentous growth MAPK pathway regulators in the mating pathway.** Wild type and mutants were grown to saturation, diluted and top spread onto YEPD plates and 10  $\mu$ l of 1  $\mu$ g/ $\mu$ l  $\alpha$ -factor was added to four separate locations on the plate. Changes in halo size reflect altered mating pathway activity.
