# Supplementary material
Source: PubMed Central journal article supplement (PMC4224168)
Supplement: b613bcb34463d4402cf3291bb76a5eda_genetics.114.168252-4.pdf [file b613bcb34463d4402cf3291bb76a5eda_genetics.114.168252-4.pdf]

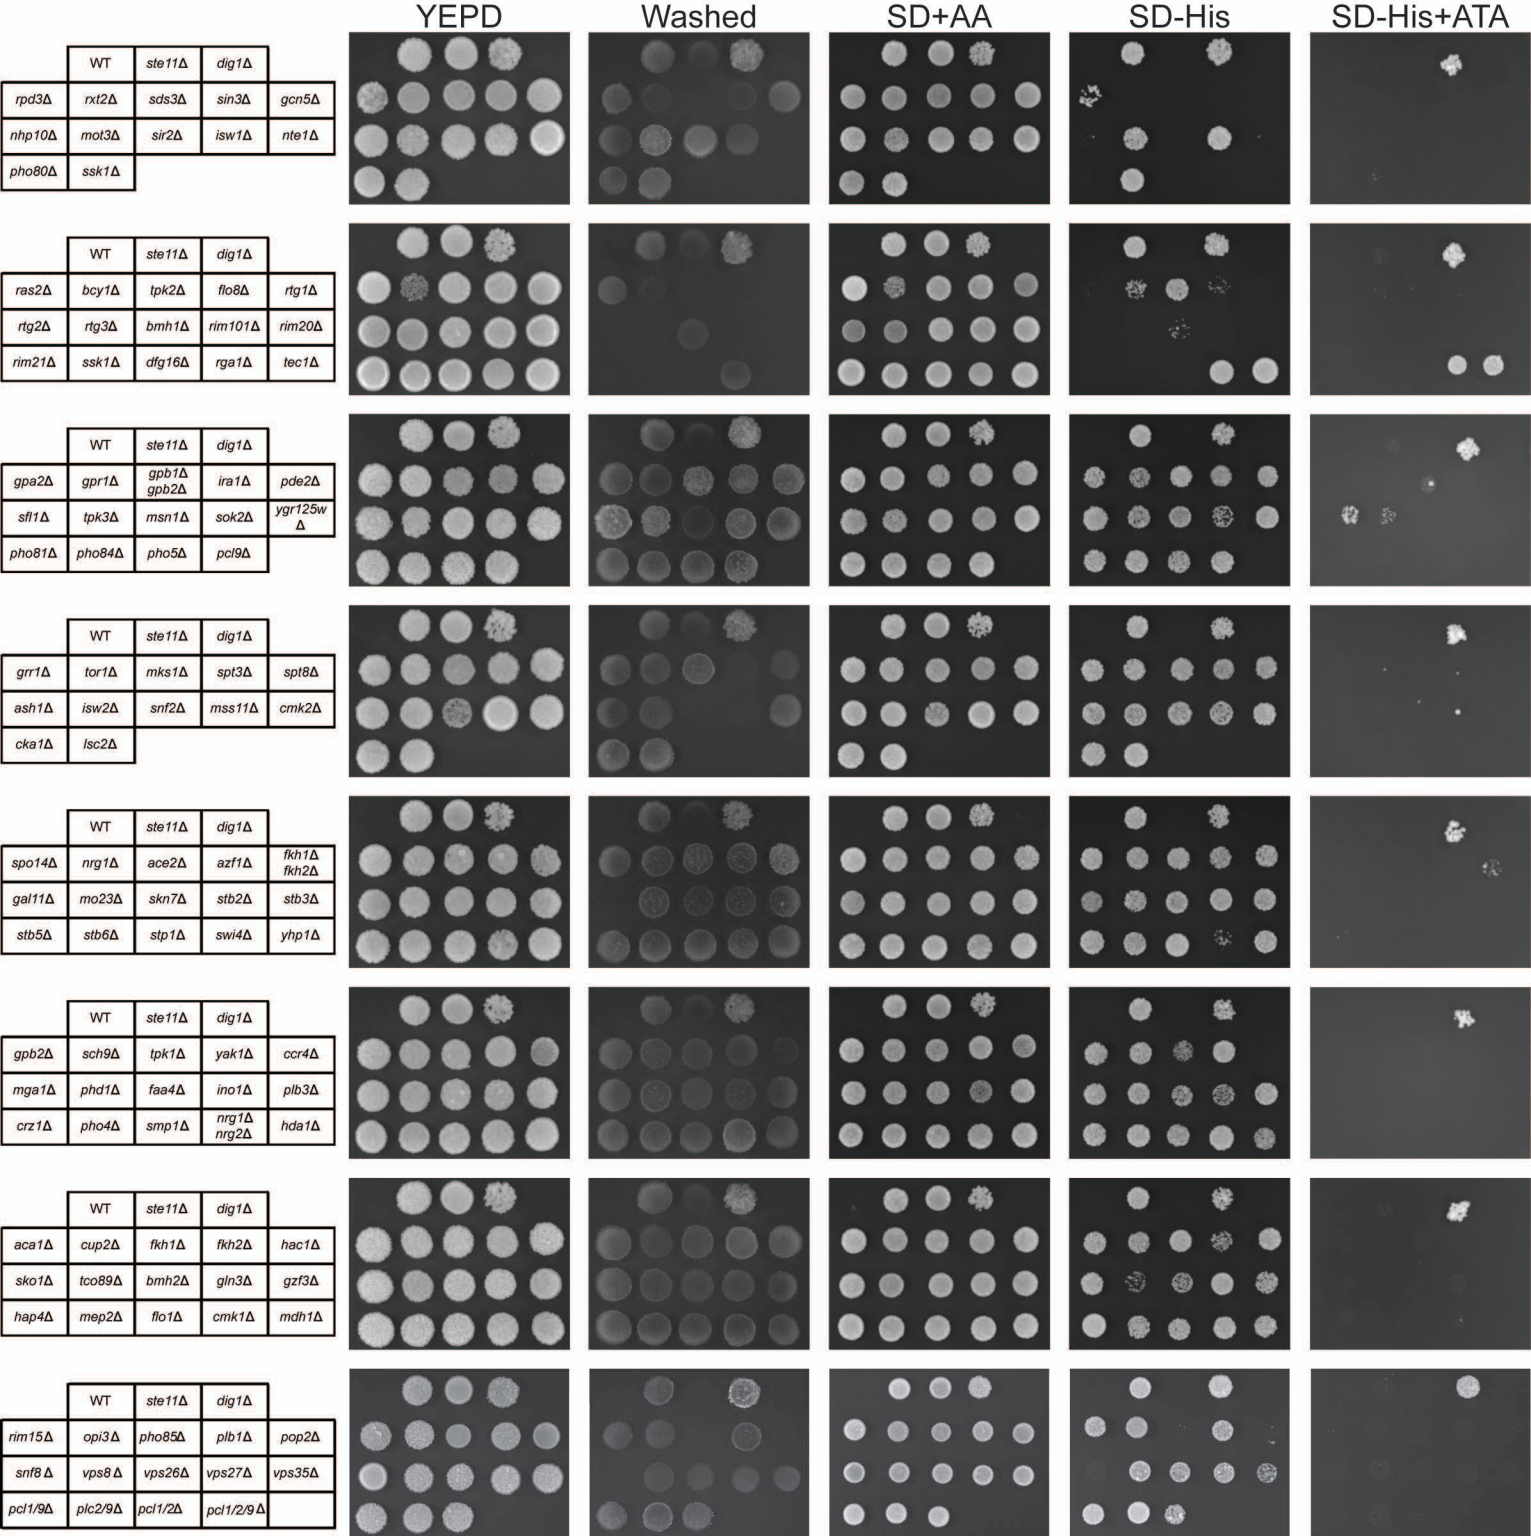

**Figure S1. Evaluation of candidate regulators of the filamentous growth MAPK pathway by the plate-washing assay and cross-talk reporter (*FUS1-HIS3*).** Wild type and control strains and the indicated mutants were spotted on to YEPD, SD-HIS, and SD-HIS + 2.5 mM ATA and incubated for 2d. No growth on SD-HIS indicates a defect in filamentous growth MAPK pathway activity. Growth on SD-HIS + 2.5 mM ATA indicates elevated filamentous growth MAPK pathway activity. YEPD plates were photographed, washed in a stream of water to reveal invaded cells, and photographed again (Washed).
