# Supplementary material
Source: PubMed Central journal article supplement (PMC4224168)
Supplement: dbef17862c38b4a2b272971e5df40c76_genetics.114.168252-11.pdf [file dbef17862c38b4a2b272971e5df40c76_genetics.114.168252-11.pdf]

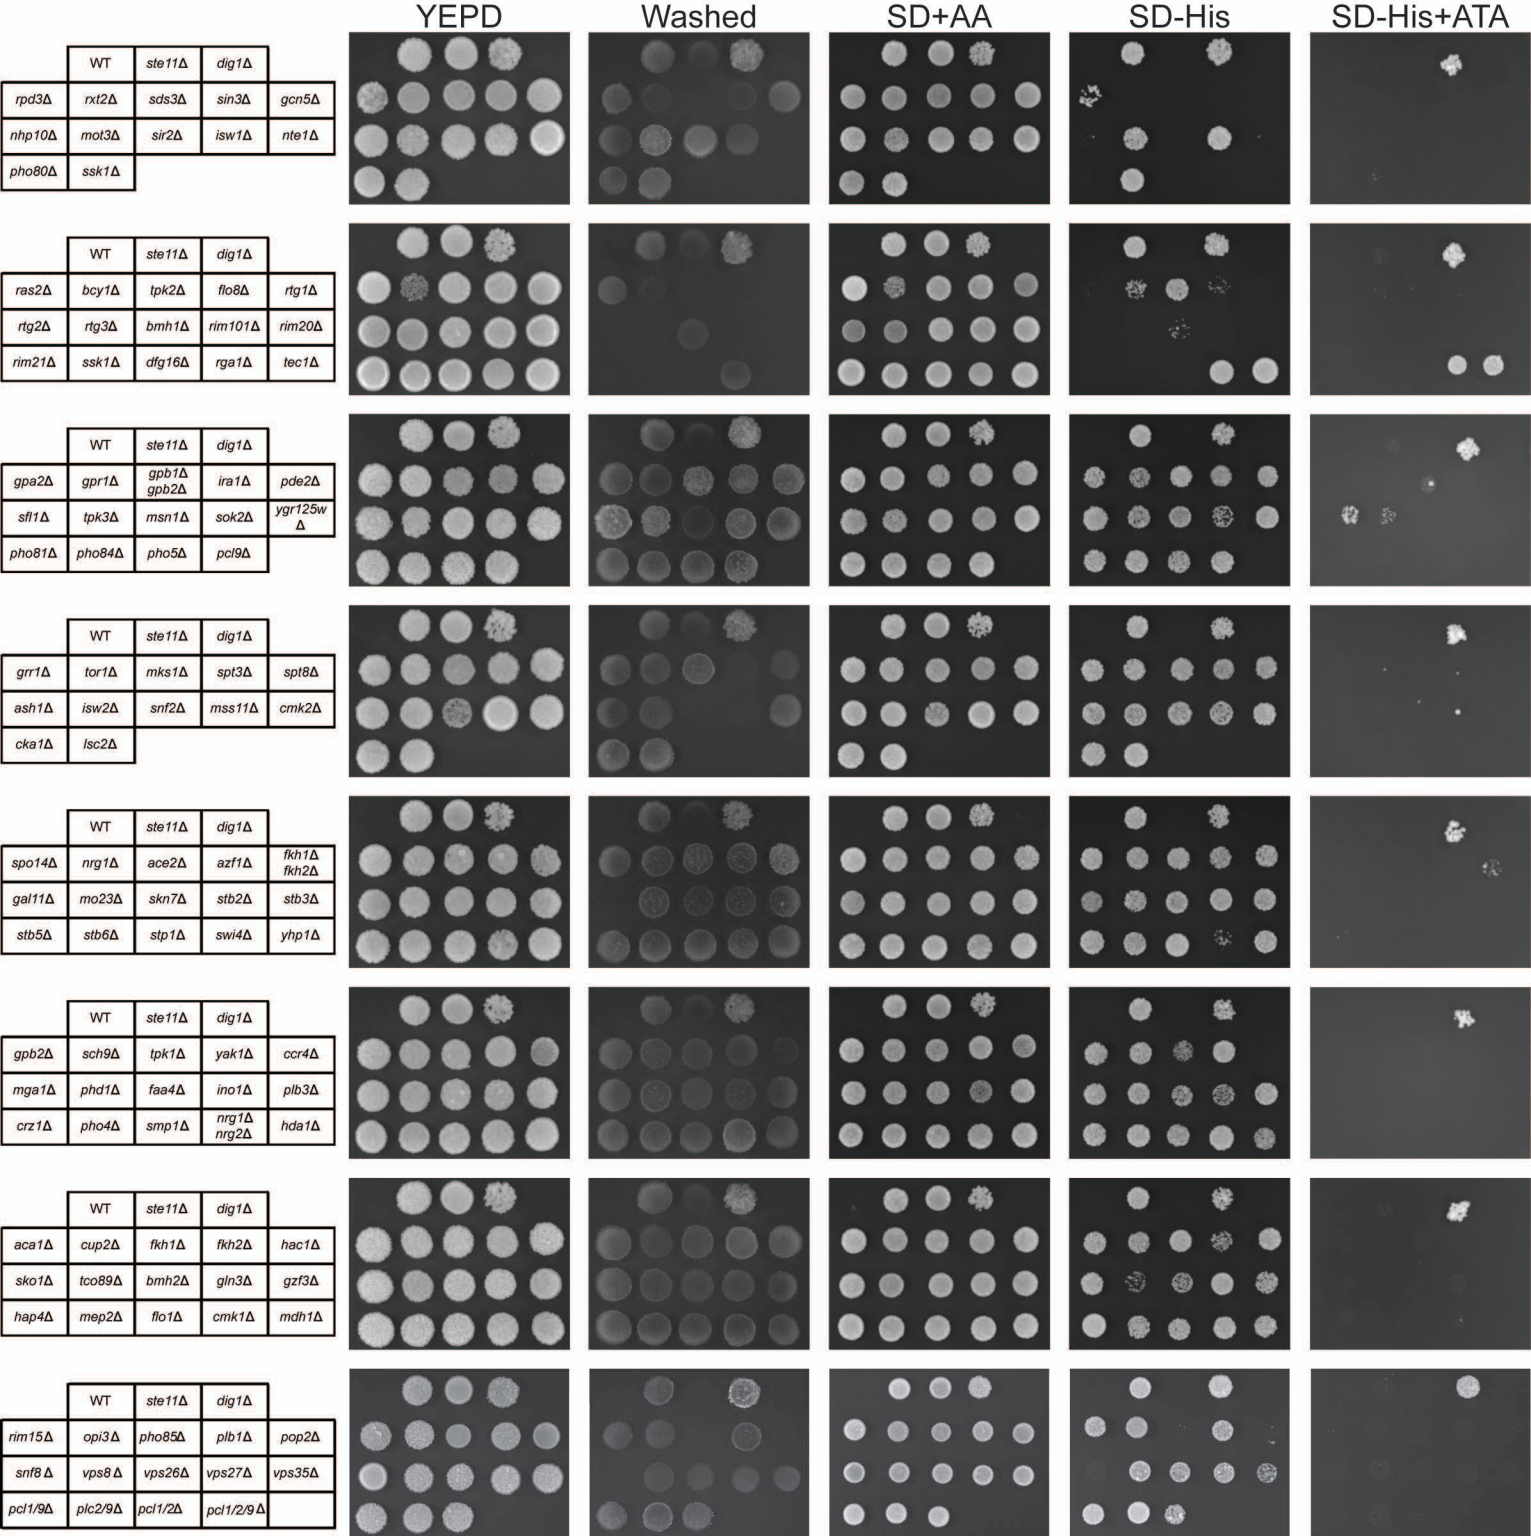

**Figure S1. Evaluation of candidate regulators of the filamentous growth MAPK pathway by the plate-washing assay and cross-talk reporter (*FUS1-HIS3*).** Wild type and control strains and the indicated mutants were spotted on to YEPD, SD-HIS, and SD-HIS + 2.5 mM ATA and incubated for 2d. No growth on SD-HIS indicates a defect in filamentous growth MAPK pathway activity. Growth on SD-HIS + 2.5 mM ATA indicates elevated filamentous growth MAPK pathway activity. YEPD plates were photographed, washed in a stream of water to reveal invaded cells, and photographed again (Washed).

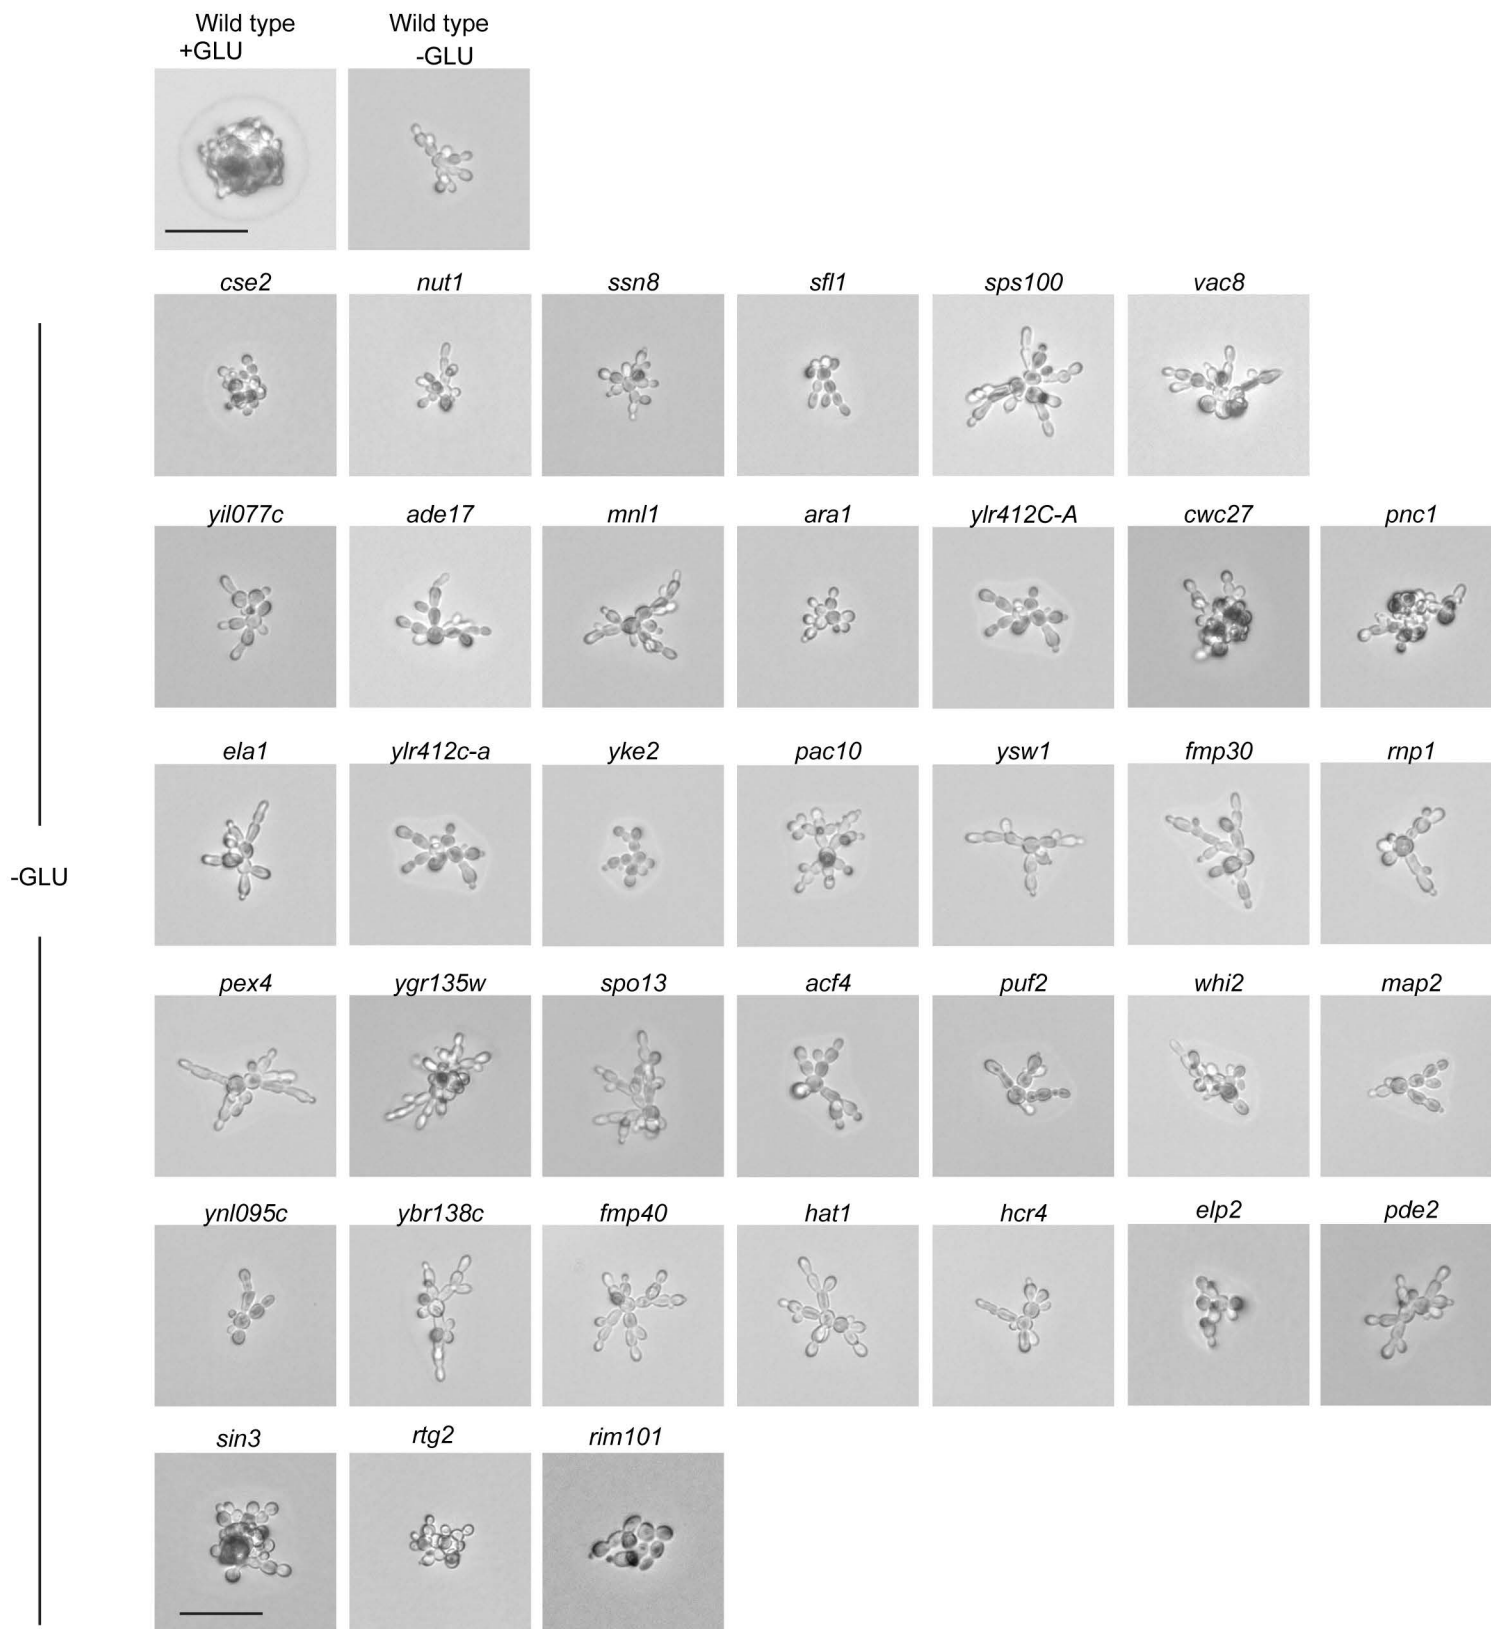

**Figure S2. The role of filamentous growth MAPK pathway regulators in filament formation by the single cell invasive growth assay.** Wild-type strain and the indicated mutants were grown on S-GLU medium for 16 hr and photographed at 100X. Bar, 20 microns.

**A**

## Plate Guide

|               | WT                             | <i>ste12Δ</i> |                               |
|---------------|--------------------------------|---------------|-------------------------------|
| <i>mcy1Δ</i>  | <i>mcy1Δ</i><br><i>ste12Δ</i>  | <i>pnc1Δ</i>  | <i>pnc1Δ</i><br><i>ste12Δ</i> |
| <i>mnl1Δ</i>  | <i>mnl1Δ</i><br><i>ste12Δ</i>  | <i>rxt3Δ</i>  | <i>rxt3Δ</i><br><i>ste12Δ</i> |
| <i>cwc27Δ</i> | <i>cwc27Δ</i><br><i>ste12Δ</i> | <i>ssn8Δ</i>  | <i>ssn8Δ</i><br><i>ste12Δ</i> |
| <i>nut1Δ</i>  | <i>nut1Δ</i><br><i>ste12Δ</i>  | <i>ela1Δ</i>  | <i>ela1Δ</i><br><i>ste12Δ</i> |

## YEPD

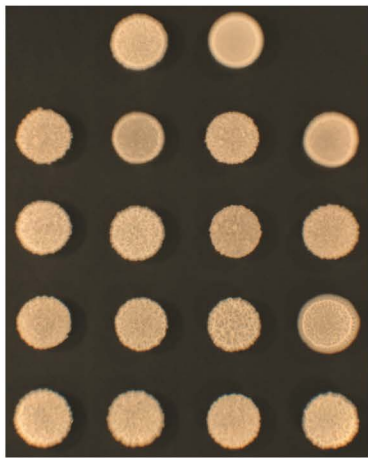

## Wash

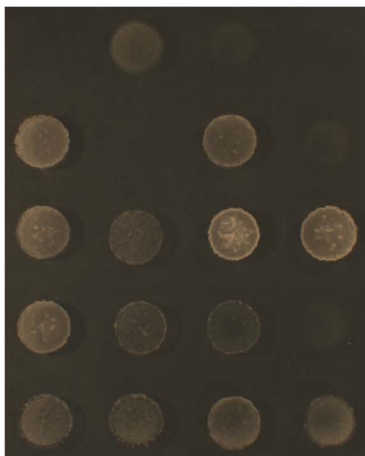**B**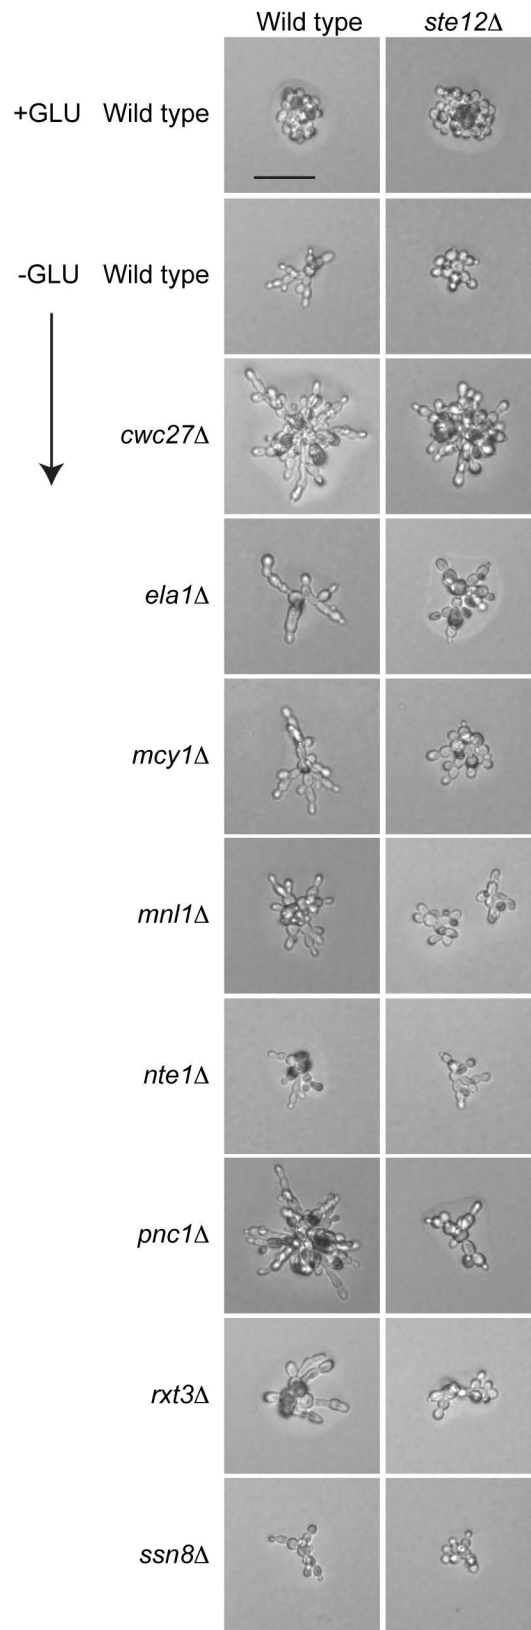

**Fig. S3. Suppression of hyper-invasive growth phenotypes of mutants identified in the screen by deletion of *STE12*.** **A)** Wild-type and *ste12Δ* mutant combinations as indicated were examined by the plate-washing assay, or in **B)** by the single cell assay. Bar, 30 microns. The *mcy1* mutant may contain a second mutation based on retesting.

**A**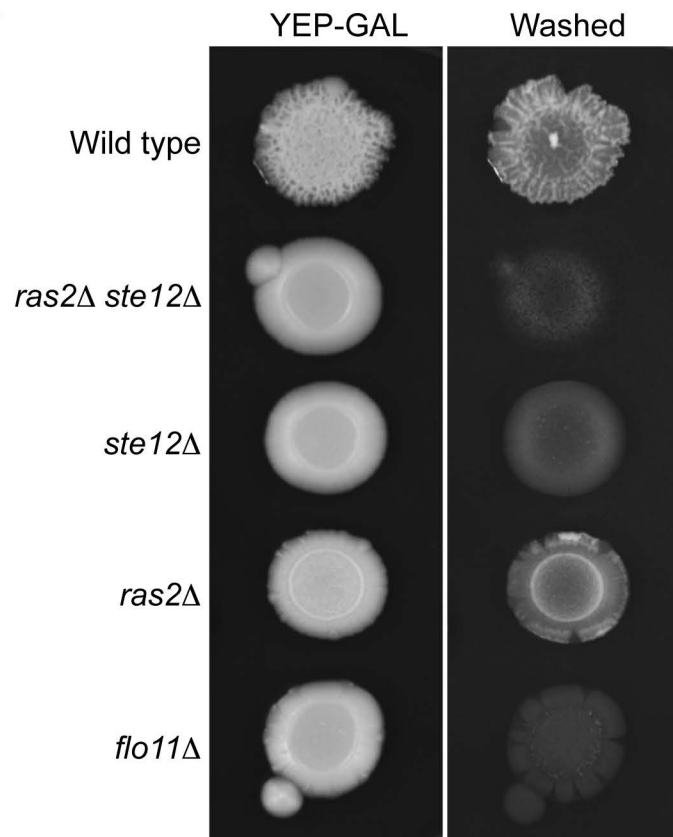**B**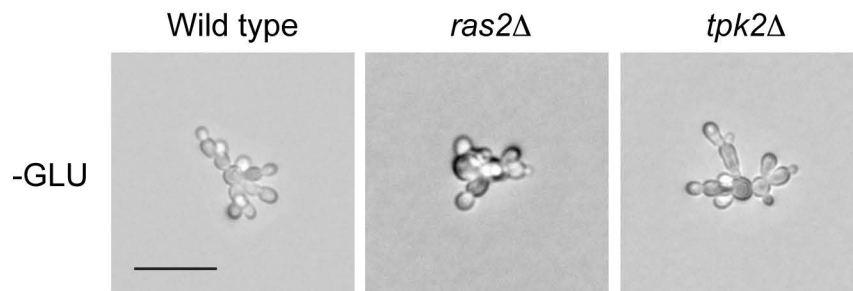

**Figure S4. Role of Ras2p and Tpk2p in conditional regulation of the filamentous growth MAPK pathway. A)**

The plate washing assay on YEP-GAL medium of wild-type cells, and the *ste12Δ*, *ras2Δ*, and *ste12Δ ras2Δ* double

mutants. **B)** Single cell assay of the *ras2Δ* and *tpk2Δ* mutant. Bar, 20 microns.

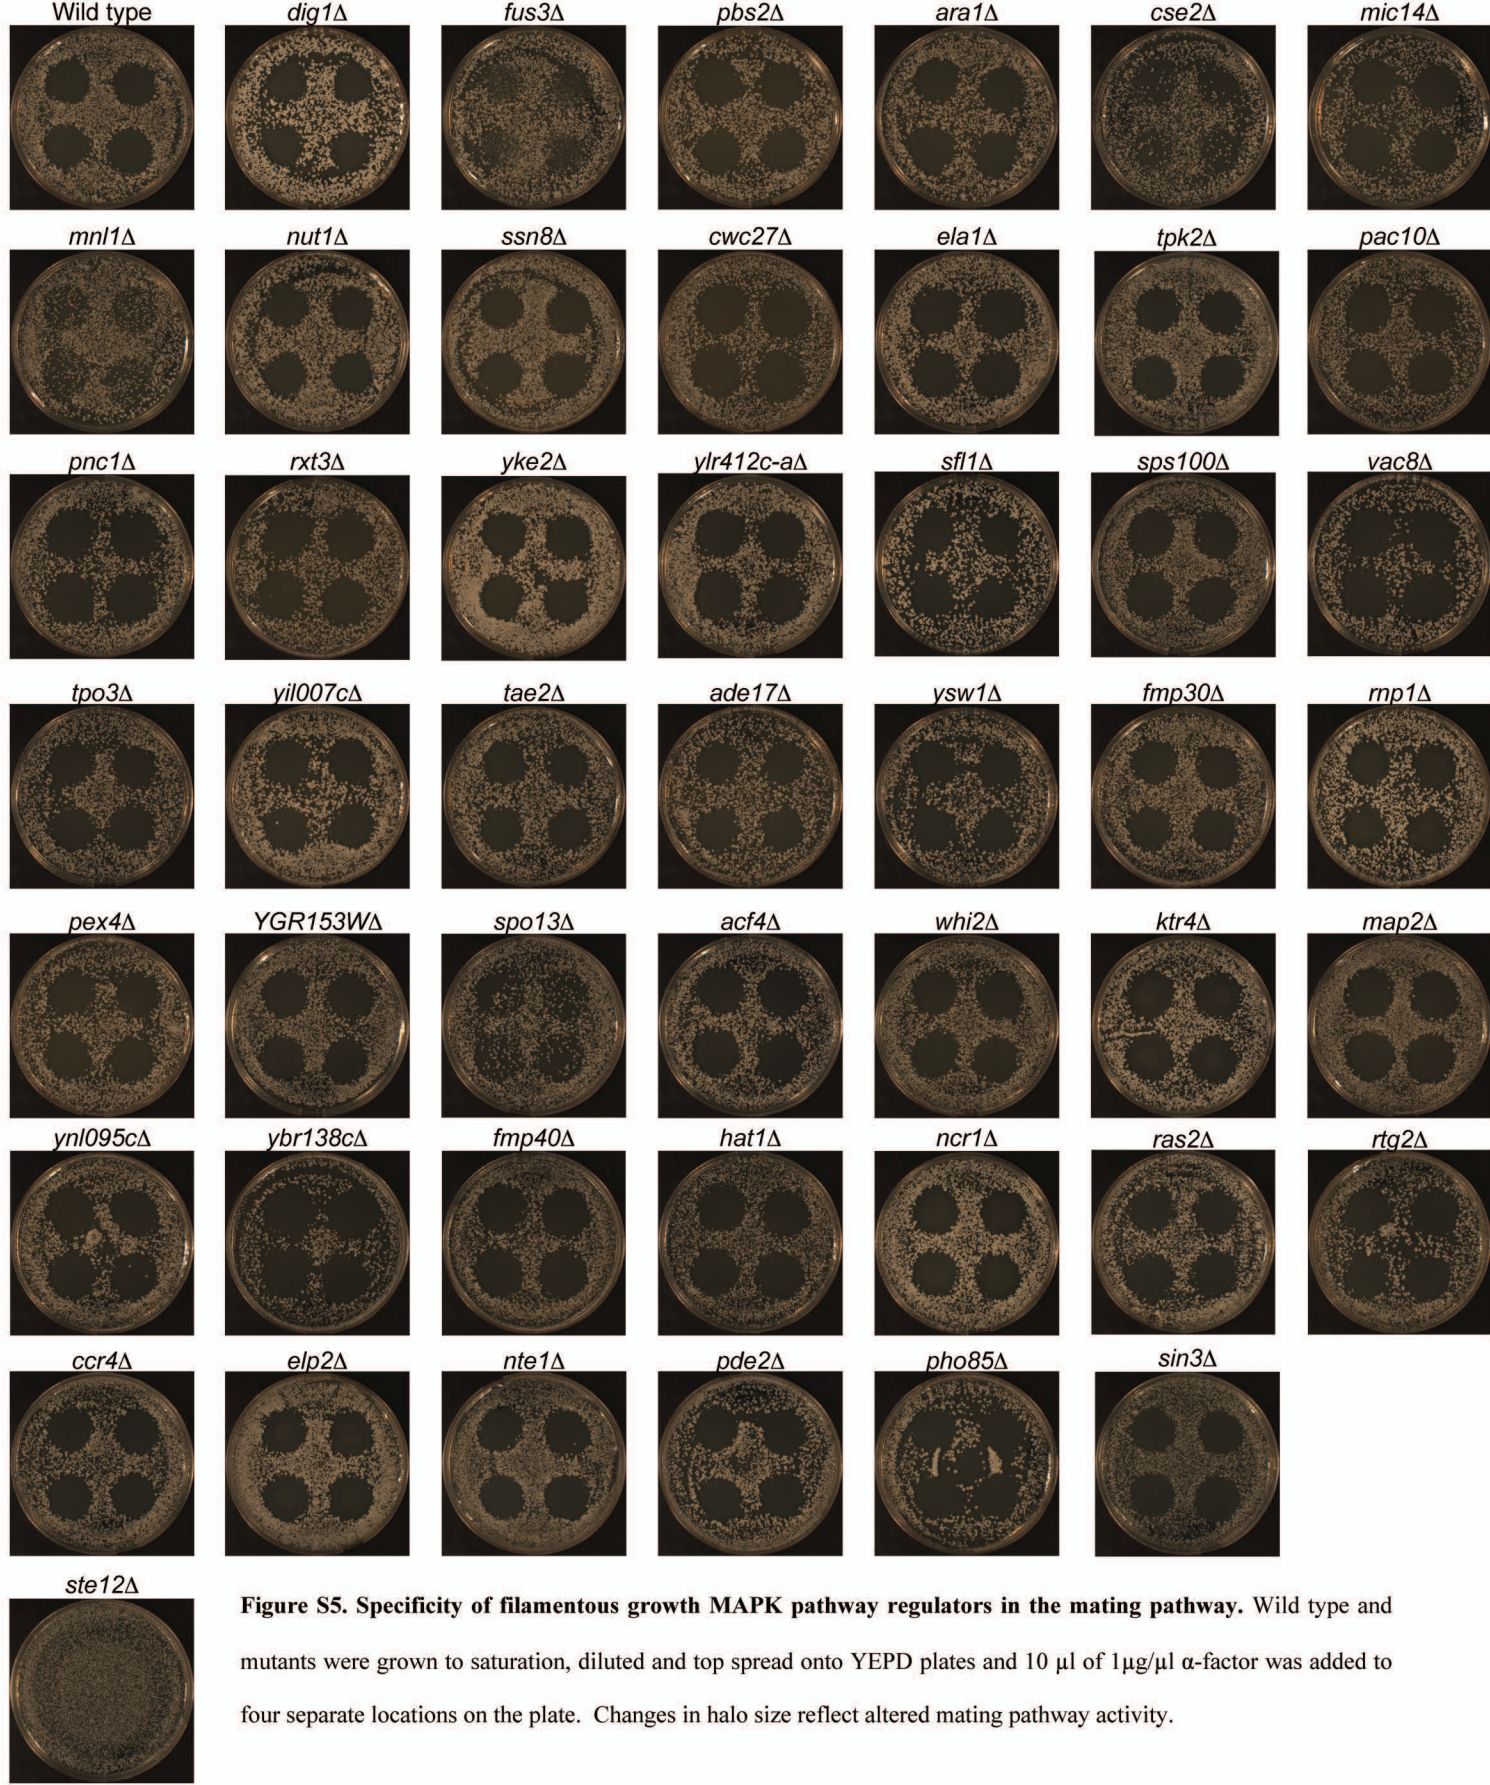

**Figure S5. Specificity of filamentous growth MAPK pathway regulators in the mating pathway.** Wild type and mutants were grown to saturation, diluted and top spread onto YEPD plates and 10  $\mu$ l of 1  $\mu$ g/ $\mu$ l  $\alpha$ -factor was added to four separate locations on the plate. Changes in halo size reflect altered mating pathway activity.

**A**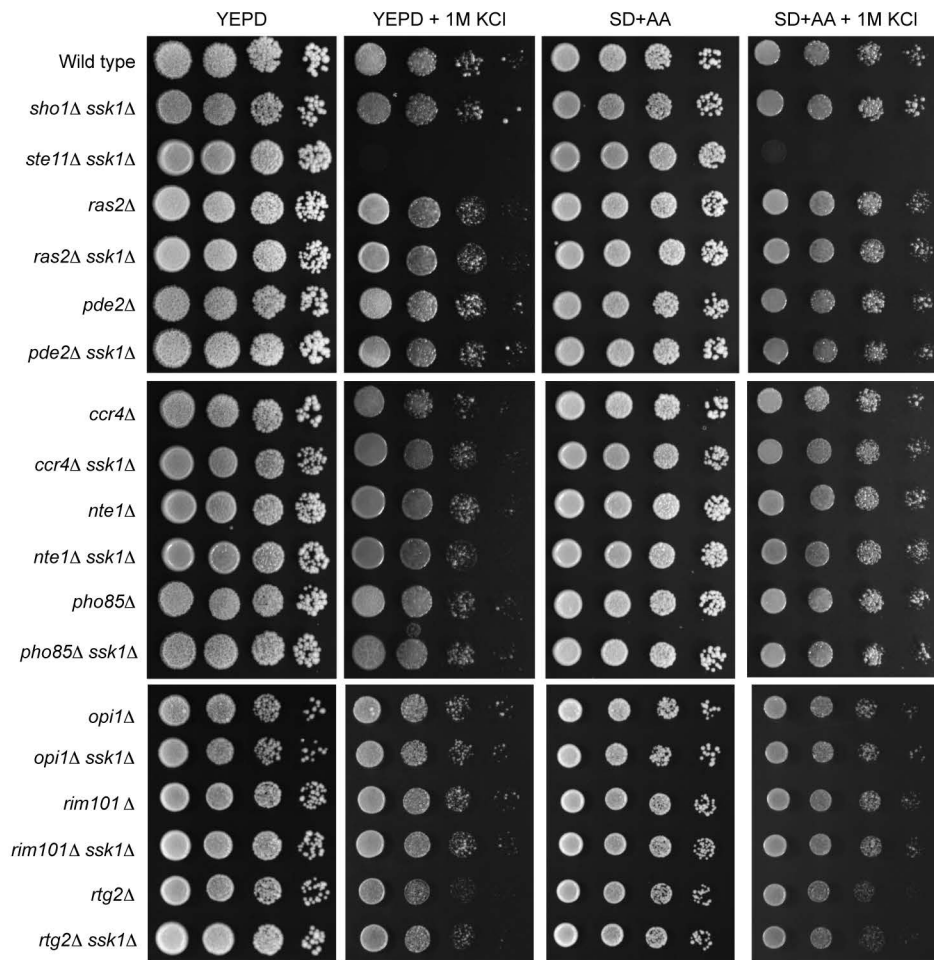**B**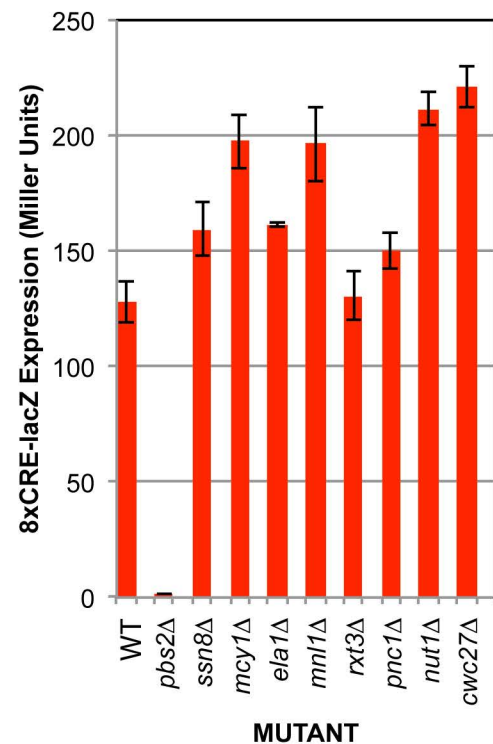

**Figure S6. Specificity of filamentous growth MAPK pathway regulators in the HOG pathway.** A) Wild type and indicated mutants were spotted on YEPD, YEPD + 1M KCl, SD + AA, and SD + AA + 1M KCl and grown for 2d. B)

Level of  $p8X$ -CRE-lacZ activity in selected mutants that show filamentous growth MAPK pathway hyper-activation.

Strains were grown in YEPD for 6 h then shifted to YEPD + .4M KCl for 30 min.

**A**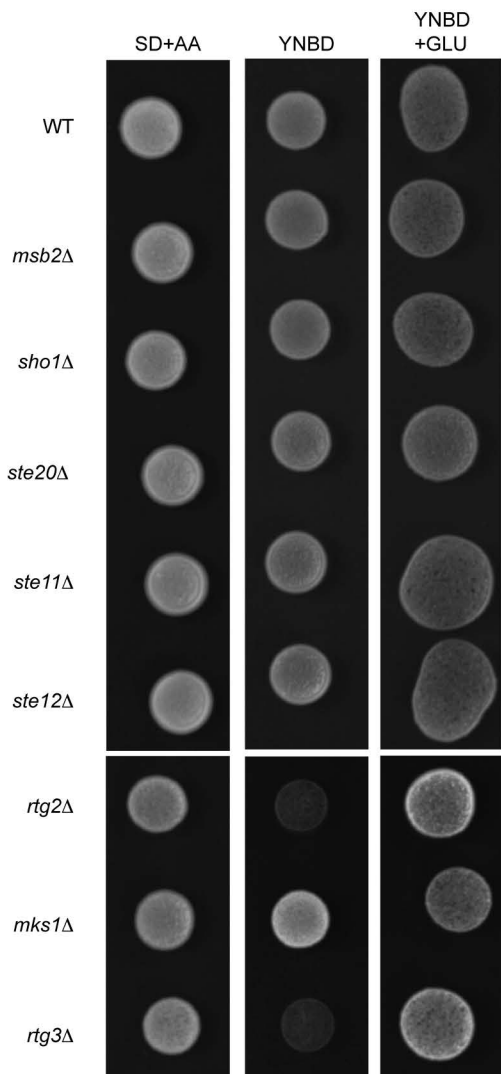**B**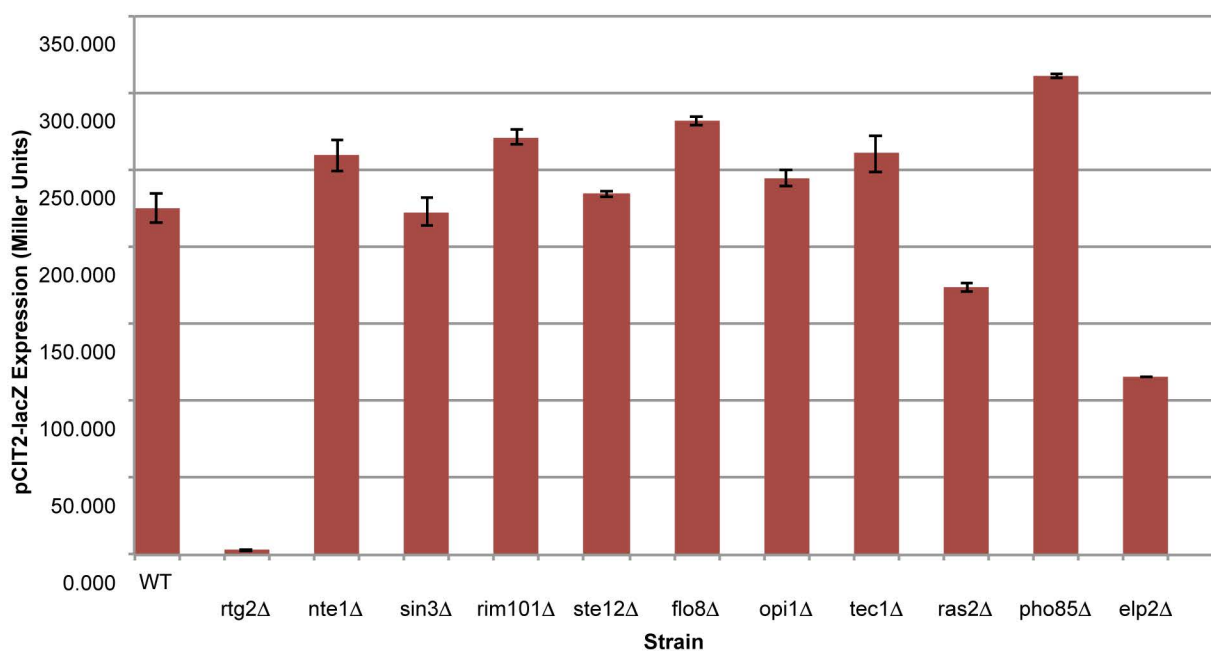

**Figure S7. The filamentous growth MAPK pathway does not regulate the RTG response.** A) Strains were spotted onto plates containing 6.7% Yeast Nitrogen Base without amino acids and supplemented with uracil with or without glutamate. Glutamate auxotrophy reflects a defective RTG pathway. B) *CIT2-lacZ* analysis of selected mutants.  $\beta$ -galactosidase assays were performed in duplicate; error bars represent standard deviation between samples.

Files S1-S2

Available for download as .mov files at <http://www.genetics.org/lookup/suppl/doi:10.1534/genetics.114.168252/-/DC1>

**File S1** Serial Z-stack images of rhodamine phalloidin stained wild-type cells grown for 16h in S-GLU.

**File S2** Serial Z-stack images of rhodamine phalloidin stained *MSB2\** cells grown for 16h in S-GLU.



Tables S1-S3

Available for download as Excel files at <http://www.genetics.org/lookup/suppl/doi:10.1534/genetics.114.168252/-/DC1>

**Table S1** Analysis of invasive growth mutants for a role in filamentous growth MAPK pathway regulation. References for previously identified regulators of filamentous growth not identified in the text are as follows: (Liu *et al.* 1993; Gimeno and Fink 1994; Stevenson *et al.* 1995; Ward *et al.* 1995; Gavrias *et al.* 1996; Lorenz and Heitman 1997; Mosch and Fink 1997; Tedford *et al.* 1997; Ramezani Rad *et al.* 1998; Entian *et al.* 1999; Gagiano *et al.* 1999; Johnson 1999; Kobayashi *et al.* 1999; Conte and Curcio 2000; Pan and Heitman 2000; Harashima and Heitman 2002; Kohler *et al.* 2002; Laprade *et al.* 2002; Smith *et al.* 2002; Breikreutz *et al.* 2003; Bao *et al.* 2004; Wu and Jiang 2005; Bester *et al.* 2006; Bhattacharyya *et al.* 2006; Ishigami *et al.* 2006; Frydlova *et al.* 2007; Tiedje *et al.* 2007; Valerius *et al.* 2007; Fidalgo *et al.* 2008; Kim and Siede 2011; Laxman and Tu 2011; Lo *et al.* 2012; Vandenbosch *et al.* 2013).

**Table S2** Analysis of invasive growth and colony morphology.

**Table S3A** Activity of the *FRE-lacZ* reporter in mutants that show hyper-filamentous growth. (See sheet 2 for *FRE-lacZ* analysis of hypo-filamentous growth mutants).

**Table S3B** Activity of the *FRE-lacZ* reporter in mutants that show hypo-invasive growth. (See sheet 1 for *FRE-lacZ* analysis of hyper-filamentous growth mutants).

## REFERENCES

- BAO, M. Z., M. A. SCHWARTZ, G. T. CANTIN, J. R. YATES, 3RD and H. D. MADHANI, 2004 Pheromone-dependent destruction of the Tec1 transcription factor is required for MAP kinase signaling specificity in yeast. *Cell* **119**: 991-1000.
- BESTER, M. C., I. S. PRETORIUS and F. F. BAUER, 2006 The regulation of *Saccharomyces cerevisiae* FLO gene expression and Ca<sup>2+</sup> - dependent flocculation by Flo8p and Mss11p. *Curr Genet* **49**: 375-383.
- BHATTACHARYYA, R. P., A. REMENYI, M. C. GOOD, C. J. BASHOR, A. M. FALICK *et al.*, 2006 The Ste5 scaffold allosterically modulates signaling output of the yeast mating pathway. *Science* **311**: 822-826.
- BREITKREUTZ, A., L. BOUCHER, B. J. BREITKREUTZ, M. SULTAN, I. JURISICA *et al.*, 2003 Phenotypic and transcriptional plasticity directed by a yeast mitogen-activated protein kinase network. *Genetics* **165**: 997-1015.
- CONTE, D., JR., and M. J. CURCIO, 2000 Fus3 controls Ty1 transpositional dormancy through the invasive growth MAPK pathway. *Mol Microbiol* **35**: 415-427.
- ENTIAN, K. D., T. SCHUSTER, J. H. HEGEMANN, D. BECHER, H. FELDMANN *et al.*, 1999 Functional analysis of 150 deletion mutants in *Saccharomyces cerevisiae* by a systematic approach. *Mol Gen Genet* **262**: 683-702.
- FIDALGO, M., R. R. BARRALES and J. JIMENEZ, 2008 Coding repeat instability in the FLO11 gene of *Saccharomyces* yeasts. *Yeast* **25**: 879-889.
- FRYDLOVA, I., M. BASLER, P. VASICOVA, I. MALCOVA and J. HASEK, 2007 Special type of pheromone-induced invasive growth in *Saccharomyces cerevisiae*. *Curr Genet* **52**: 87-95.
- GAGIANO, M., D. VAN DYK, F. F. BAUER, M. G. LAMBRECHTS and I. S. PRETORIUS, 1999 Msn1p/Mss10p, Mss11p and Muc1p/Flo11p are part of a signal transduction pathway downstream of Mep2p regulating invasive growth and pseudohyphal differentiation in *Saccharomyces cerevisiae*. *Mol Microbiol* **31**: 103-116.
- GAVRIAS, V., A. ANDRIANOPOULOS, C. J. GIMENO and W. E. TIMBERLAKE, 1996 *Saccharomyces cerevisiae* TEC1 is required for pseudohyphal growth. *Mol Microbiol* **19**: 1255-1263.
- GIMENO, C. J., and G. R. FINK, 1994 Induction of pseudohyphal growth by overexpression of PHD1, a *Saccharomyces cerevisiae* gene related to transcriptional regulators of fungal development. *Mol Cell Biol* **14**: 2100-2112.
- HARASHIMA, T., and J. HEITMAN, 2002 The Galpha protein Gpa2 controls yeast differentiation by interacting with kelch repeat proteins that mimic Gbeta subunits. *Mol Cell* **10**: 163-173
- ISHIGAMI, M., Y. NAKAGAWA, M. HAYAKAWA and Y. IIMURA, 2006 FLO11 is the primary factor in flor formation caused by cell surface hydrophobicity in wild-type flor yeast. *Biosci Biotechnol Biochem* **70**: 660-666.
- JOHNSON, D. I., 1999 Cdc42: An essential Rho-type GTPase controlling eukaryotic cell polarity. *Microbiol Mol Biol Rev* **63**: 54-105.
- KIM, E., and W. SIEDE, 2011 Phenotypes associated with *Saccharomyces cerevisiae* Hug1 protein, a putative negative regulator of dNTP Levels, reveal similarities and differences with sequence-related Dif1. *J Microbiol* **49**: 78-85.
- KOBAYASHI, O., H. YOSHIMOTO and H. SONE, 1999 Analysis of the genes activated by the FLO8 gene in *Saccharomyces cerevisiae*. *Curr Genet* **36**: 256-261.
- KOHLER, T., S. WESCHE, N. TAHERI, G. H. BRAUS and H. U. MOSCH, 2002 Dual role of the *Saccharomyces cerevisiae* TEA/ATTS family transcription factor Tec1p in regulation of gene expression and cellular development. *Eukaryot Cell* **1**: 673-686.
- LAPRADE, L., V. L. BOYARTCHUK, W. F. DIETRICH and F. WINSTON, 2002 Spt3 plays opposite roles in filamentous growth in *Saccharomyces cerevisiae* and *Candida albicans* and is required for *C. albicans* virulence. *Genetics* **161**: 509-519.
- LAXMAN, S., and B. P. TU, 2011 Multiple TORC1-associated proteins regulate nitrogen starvation-dependent cellular differentiation in *Saccharomyces cerevisiae*. *PLoS One* **6**: e26081.
- LIU, H., C. A. STYLES and G. R. FINK, 1993 Elements of the yeast pheromone response pathway required for filamentous growth of diploids. *Science* **262**: 1741-1744.
- LO, T. L., Y. QU, N. UWAMAHORO, T. QUENAULT, T. H. BEILHARZ *et al.*, 2012 The mRNA decay pathway regulates the expression of the Flo11 adhesin and biofilm formation in *Saccharomyces cerevisiae*. *Genetics* **191**: 1387-1391.
- LORENZ, M. C., and J. HEITMAN, 1997 Yeast pseudohyphal growth is regulated by GPA2, a G protein alpha homolog. *Embo J* **16**: 7008-7018.
- MOSCH, H. U., and G. R. FINK, 1997 Dissection of filamentous growth by transposon mutagenesis in *Saccharomyces cerevisiae*. *Genetics* **145**: 671-684.
- O'ROURKE, S. M., and I. HERSKOWITZ, 1998 The Hog1 MAPK prevents cross talk between the HOG and pheromone response MAPK pathways in *Saccharomyces cerevisiae*. *Genes Dev* **12**: 2874-2886.
- PAN, X., and J. HEITMAN, 2000 Sok2 regulates yeast pseudohyphal differentiation via a transcription factor cascade that regulates cell-cell adhesion. *Mol Cell Biol* **20**: 8364-8372.
- RAMEZANI RAD, M., G. JANSEN, F. BUHRING and C. P. HOLLENBERG, 1998 Ste50p is involved in regulating filamentous growth in the yeast *Saccharomyces cerevisiae* and associates with Ste11p. *Mol Gen Genet* **259**: 29-38.
- SMITH, G. R., S. A. GIVAN, P. CULLEN and G. F. SPRAGUE, JR., 2002 GTPase-activating proteins for Cdc42. *Eukaryot Cell* **1**: 469-480.

- STEVENSON, B. J., B. FERGUSON, C. DE VIRGILIO, E. BI, J. R. PRINGLE *et al.*, 1995 Mutation of RGA1, which encodes a putative GTPase-activating protein for the polarity-establishment protein Cdc42p, activates the pheromone-response pathway in the yeast *Saccharomyces cerevisiae*. *Genes Dev* **9**: 2949-2963.
- TEDFORD, K., S. KIM, D. SA, K. STEVENS and M. TYERS, 1997 Regulation of the mating pheromone and invasive growth responses in yeast by two MAP kinase substrates. *Curr Biol* **7**: 228-238.
- TIEDJE, C., D. G. HOLLAND, U. JUST and T. HOFKEN, 2007 Proteins involved in sterol synthesis interact with Ste20 and regulate cell polarity. *J Cell Sci* **120**: 3613-3624.
- VALERIUS, O., M. KLEINSCHMIDT, N. RACHFALL, F. SCHULZE, S. LOPEZ MARIN *et al.*, 2007 The *Saccharomyces* homolog of mammalian RACK1, Cpc2/Asc1p, is required for FLO11-dependent adhesive growth and dimorphism. *Mol Cell Proteomics* **6**: 1968-1979.
- VANDEBOSCH, D., E. DE CANCK, I. DHONDT, P. RIGOLE, H. J. NELIS *et al.*, 2013 Genomewide screening for genes involved in biofilm formation and miconazole susceptibility in *Saccharomyces cerevisiae*. *FEMS Yeast Res* **13**: 720-730.
- WARD, M. P., C. J. GIMENO, G. R. FINK and S. GARRETT, 1995 SOK2 may regulate cyclic AMP-dependent protein kinase-stimulated growth and pseudohyphal development by repressing transcription. *Mol Cell Biol* **15**: 6854-6863.
- WU, X., and Y. W. JIANG, 2005 Genetic/genomic evidence for a key role of polarized endocytosis in filamentous differentiation of *S. cerevisiae*. *Yeast* **22**: 1143-1153.
- YAMAMOTO, K., K. TATEBAYASHI, K. TANAKA and H. SAITO, 2010 Dynamic control of yeast MAP kinase network by induced association and dissociation between the Ste50 scaffold and the Opy2 membrane anchor. *Mol Cell* **40**: 87-98.
- YANG, H. Y., K. TATEBAYASHI, K. YAMAMOTO and H. SAITO, 2009 Glycosylation defects activate filamentous growth Kss1 MAPK and inhibit osmoregulatory Hog1 MAPK. *Embo J* **28**: 1380-1391.
